# Supplementary material for: Dermal Olfactory Receptor OR51B5 Is Essential for Survival and Collagen Synthesis in Human Dermal Fibroblast (Hs68 Cells)
Source: MDPI journal article supplement (doi:10.3390/ijms22179273), 2021-08-27
Supplement: s1 [file s1]

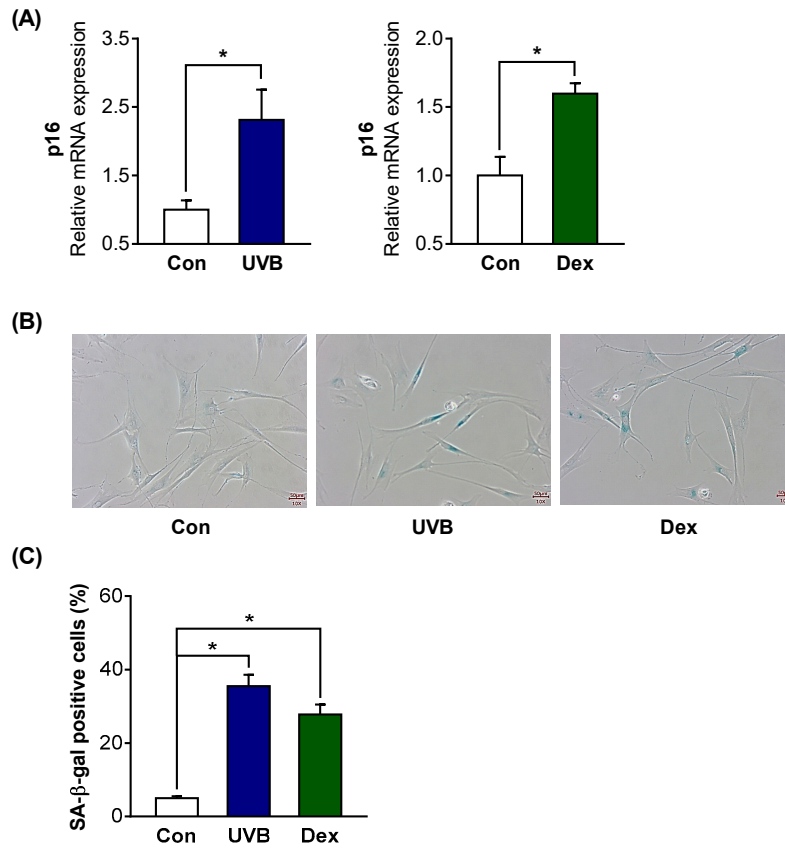

**Figure S1.** The effects of ultraviolet B (UVB) radiation or dexamethasone (Dex) on the cellular senescence markers in Hs68 cells. The cells were treated with or without 20 mJ/cm<sup>2</sup> UVB or 1 μM Dex. After treatment for 12 h, **(A)** the p16 mRNA levels were analyzed by quantitative polymerase chain reaction (PCR). Glyceraldehyde 3-phosphate dehydrogenase (*GAPDH*) was used as reference gene for PCR. **(B)** The cells were stained with the Senescence-associated β-galactosidase (SA-β-gal) staining kit. Representative image of SA-β-gal staining. **(C)** Percentage of SA-β-gal-positive cells. The results are expressed as mean ± standard error of mean (SEM) of three independent experiments. \**p*<0.05.

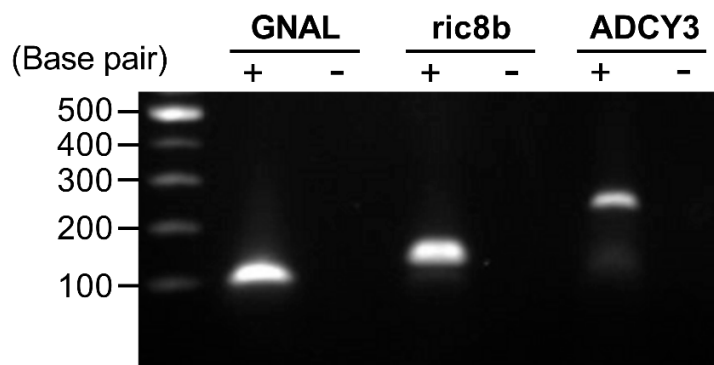

**Figure S2.** The presence of olfactory signaling pathway components in Hs68 cells. Agarose gel electrophoresis shows (amplification) semi-quantitative polymerase chain reaction (PCR) of olfactory signaling pathway components genes, including G Protein Subunit Alpha L (*GNAL*), *ric8b*, and adenylate cyclase type 3 (*ADCY3*) in Hs68 cells. +, reaction containing reverse transcriptase; –, reaction without reverse transcriptase.

**Table S1.** Sequences of primers used in this study.

| Gene name                                                         | Primer sequences (5'→ 3')                               |
|-------------------------------------------------------------------|---------------------------------------------------------|
| p16                                                               | F: TGCCCAACGCACCGAATAG<br>R: CCCCTGCAAACCTTCGTCCTC      |
| Collagen type I alpha 1 chain ( <i>COL1A1</i> )                   | F: TTGCTCCCCAGCTGTCTTAT<br>R: AGACCACGAGGACCAGAGG       |
| Olfactory Receptor Family 1 Subfamily C Member 1 ( <i>OR1C1</i> ) | F: CACGCCCCCTGTCTGTCTGTATCC<br>R: TGGCTGTGCCGTAAAACAAC  |
| <i>OR2AE1</i>                                                     | F: TGTGGCAGAAGAATCAGACC<br>R: GAGAATGGTGAGGGTGTTGC      |
| <i>OR2AG2</i>                                                     | F: TCTACAGCCTGAGGAATAAGGA<br>R: GGAGGAATGGTGAGAGGCAA    |
| <i>OR2AK2</i>                                                     | F: TCTATGCAACCACTCTCTTTACC<br>R: AAATACTGCCACCGCCTTATCC |
| <i>OR2A1/42</i>                                                   | F: GCATGACGCAGACCTTTCTCT<br>R: GCAGTCTTAGGATGAGAACCA    |
| <i>OR2A4/7</i>                                                    | F: GACCTCATTCAACCTCACAAATC<br>R: ATTCATTCAGCGGCAAACAC   |
| <i>OR2B6</i>                                                      | F: GTTGTCTACCCTGACTCTCCA<br>R: GCCTCATTTGCTGTTGTCTCA    |
| <i>OR2W3</i>                                                      | F: ATGGATGGAACCAATGGCAG<br>R: GAGGTACGCGATCAGGATGA      |
| <i>OR7D2</i>                                                      | F: TCAGCTACATGGAAGCAGGAA<br>R: GGACGATGCAAGTGCTGAAA     |
| <i>OR10A4</i>                                                     | F: CCCTTGCACTACCCAGTCATC<br>R: TCAGAGCCTCCAGTTCAAACA    |
| <i>OR10A5</i>                                                     | F: CAAAGGACACGGGCCAAAC<br>R: CAGCAATGCGAGTATAGGAAC      |
| <i>OR10AD1</i>                                                    | F: TCCGCAGAGACAACCAACATAG<br>R: GGTGAGAGGCACAAGTAGAGA   |
| <i>OR51B4</i>                                                     | F: CTGCTAGACCAGAGGGAGATT<br>R: TGTTCACTACTCGGGAATTGGT   |
| <i>OR51B5</i>                                                     | F: AGAAACCAAGAGCCACGACT<br>R: GTGAGGCAACAACCTCAGCAC     |
| <i>OR51I1</i>                                                     | F: CCATGCTCAACCTATCATCTA<br>R: GGCCTGGGATTTATGGAAGAA    |
| <i>OR52D1</i>                                                     | F: TCTCCCCCTTCATCTTCTTGCT<br>R: GAGCCACAGTTAGCCCATAGA   |
| ATPase Family AAA Domain Containing 3A ( <i>ATAD3A</i> )          | F: GCTGTTGGGGTCTACTCAGC<br>R: AAGGGACTCAGCCAGGAACT      |
| Aurora Kinase B ( <i>AURKB</i> )                                  | F: GGAGTGCTTTGCTATGAGCTGC                               |

| Gene name                                                             | Primer sequences (5'→ 3')                                |
|-----------------------------------------------------------------------|----------------------------------------------------------|
|                                                                       | R: GAGCAGTTTGGAGATGAGGTCC                                |
| Cell Division Cycle 73 ( <i>CDC73</i> )                               | F: GCCTTCCATCTGAAGTATGATGA<br>R: TGTACCTGTCCAATGTTTCCC   |
| Cyclin Dependent Kinase 1 ( <i>CDK1</i> )                             | F: TACAGGTCAAGTGGTAGCCA<br>R: AGCACATCCTGAAGACTGACT      |
| Chromodomain Helicase DNA Binding Protein 8 ( <i>CHD8</i> )           | F: GGTCACACAAGACCCCATTGA<br>R: AGGGACCAGTTCACCTGCTG      |
| $\alpha$ -Enolase 1 ( <i>ENO1</i> )                                   | F: ACGAGACCCAGTGGCTAGAAG<br>R: TGGGCTGTGGGTTCTAAGG       |
| Frataxin ( <i>FXN</i> )                                               | F: AAGCCATACACGTTTGAGGACTA<br>R: TTGGCGTCTGCTTGTGATCA    |
| Histone Deacetylase 3 ( <i>HDAC3</i> )                                | F: TTGAAGATGCTGAACCATGC<br>R: TGGCCTGCTGTAGTTCTCCT       |
| Heterogeneous Nuclear Ribonucleoprotein K ( <i>HNRNPK</i> )           | F: AGACCTGGAGACCGTTAC<br>R: ATAAGCCATCTGCCATTC           |
| Heat Shock Transcription Factor 1 ( <i>HSF1</i> )                     | F: GAACAGCTTCCACGTGTTCTG<br>R: TGGCCATGTTGTTGTGCTTG      |
| Heat Shock Protein Family D (Hsp60) Member 1 ( <i>HSPD1</i> )         | F: TAGCTGTTACAATGGGGCCA<br>R: GGCAACGTCCTGAACAAGTT       |
| Lysine Demethylase 1A ( <i>KDM1A</i> )                                | F: TGACCGGATGACTTCTCAAGA<br>R: GTTGGAGAGTAGCCTCAAATGTC   |
| Mediator Complex Subunit 1 ( <i>MED1</i> )                            | F: TGATCTTCCTGCGTGTTCCTTC<br>R: ACAACGGGATTCTCTGTGCAA    |
| Mechanistic Target Of Rapamycin Kinase ( <i>MTOR</i> )                | F: CGCTGTCATCCCTTTATCG<br>R: ATGCTCAAACACCTCCACC         |
| MYC proto-oncogene, bHLH transcription factor ( <i>MYC</i> )          | F: GCGCCCATTAATACCCTTCTTTC<br>R: CTCTCAAACCCTCTCCCTTTCTC |
| N-Alpha-Acetyltransferase 15, NatA Auxiliary Subunit ( <i>NAA15</i> ) | F: GCTTTGCTGTGGGCTTTATC<br>R: ACAAGACTTCCCTGAACCTTACC    |
| Nucleoporin 62 ( <i>NUP62</i> )                                       | F: GCCTCGGCTGAAGAAAGAAG<br>R: CTCTGGCTCCCAAAGCAAATC      |
| PCI Domain Containing 2 ( <i>PCID2</i> )                              | F: ATGGTGTGGACACGTCAAAG<br>R: TCAGCACAACCAAAGTGGAAG      |
| 3-Phosphoinositide Dependent Protein Kinase 1 ( <i>PDPK1</i> )        | F: GGCGGAAACCCTTGCTTAAC<br>R: TATCGCTGCCTCCAAACCTC       |
| Prohibitin 2 ( <i>PHB2</i> )                                          | F: AGCAGGAACAGCACAGAAGA<br>R: CGGAGCTTGATATAGCCAGGAT     |
| Polo Like Kinase 1 ( <i>PLK1</i> )                                    | F: CCAGAGGGAGAAGATGTCCA<br>R: CAACACCACGAACACGAAGT       |
| Protein Kinase, DNA-Activated, Catalytic Subunit ( <i>PRKDC</i> )     | F: GAACACCATGTCCCAAGAGGAG<br>R: GGCTTGTA CT CATCCTCACG   |
| Protein Tyrosine Phosphatase Non-Receptor Type 1 ( <i>PTPN1</i> )     | F: GCTGATACCTGCCTCTTGCTGATG<br>R: AGCTGGTCGGCTGTCTGGATC  |
| Ribosomal Protein L10 ( <i>RPL10</i> )                                | F: GATGCCAAGATTGCGATTTTGTG                               |

| Gene name                                                             | Primer sequences (5'→ 3')                                 |
|-----------------------------------------------------------------------|-----------------------------------------------------------|
|                                                                       | R: AGCTGCTCATATTCATCTGACA                                 |
| Ribosomal Protein S27a ( <i>RPS27A</i> )                              | F: CTGGAAGATGGACGTACTTTGTC<br>R: CGACGAAGGCGACTAATTTTGC   |
| Ribosomal Protein S3A ( <i>RPS3A</i> )                                | F: AAATCATGACCCGAGAGGT G<br>R: T TGGGCTTCTTCAGCAT TTT     |
| Ribosomal Protein S6 ( <i>RPS6</i> )                                  | F: CTTCAGAGCAATACGCCGCCG<br>R: GCCGCATCCACACAGTCCGT       |
| Splicing Factor Proline And Glutamine Rich ( <i>SFPQ</i> )            | F: CTGGGAAATGCATCTGGAGG<br>R: GCGTGCTTCCTATATGCCAA        |
| SON DNA And RNA Binding Protein ( <i>SON</i> )                        | F: TGGCCCTGATCATCGCAAAC<br>R: ACATACAATTGGGTCTGGTAAGG     |
| Signal Transducer And Activator Of Transcription 5B ( <i>STAT5B</i> ) | F: CAGCCTGGACGTGCTACAGT<br>R: TGGTCACCAGGGCTGAGATA        |
| Suv3 Like RNA Helicase ( <i>SUPV3L1</i> )                             | F: GTTGAATTTGGAGGGCTTTCC<br>R: GCTGGGTGGCTCAGTAGCTT       |
| Transferrin Receptor ( <i>TFRC</i> )                                  | F: GTCGCTGGTCAGTTCGTGATT<br>R: AGCAGTTGGCTGTTGTACCTCTC    |
| Tumor Protein, Translationally-Controlled 1 ( <i>TPT1</i> )           | F: TATTGGACTACCGTGAGG<br>R: CAAGCAGAAGCCAGTTATG           |
| TP53 Regulated Inhibitor Of Apoptosis 1 ( <i>TRIAP1</i> )             | F: GTGGCCTGGATTAGCAAAGAG<br>R: GGTTCCTCCTCCACAGCTATTC     |
| Arrestin Beta 2 ( <i>ARRB2</i> )                                      | F: CCCTCAATGTAAATGTCCACG<br>R: GATGTCGGCGTACTGTCTCAC      |
| Bone Morphogenetic Protein 4 ( <i>BMP4</i> )                          | F: CCGCAGCCTAGCAAGAGTG<br>R: GCTCAGGATACTCAAGACCACTG      |
| Chromobox 8 ( <i>CBX8</i> )                                           | F: GTGTGTGTATGTGTCTCCTTCTC<br>R: TCACGACCGCAGAAGATAGG     |
| cAMP Responsive Element Binding Protein 3 Like 1 ( <i>CREB3L1</i> )   | F: GAAGGTGGAGACCCTGGAGAATG<br>R: GAGCCCAGCACCAGAACAAAG    |
| Connective tissue growth factor ( <i>CTGF</i> )                       | F: CTGGGAAGCCATCACTTACCTTGC<br>R: GTTCTAGAGTCGCTGGGAAGCTG |
| Endoglin ( <i>ENG</i> )                                               | F: AGCTGACTCTCCAGGCATCC<br>R: GCAGCTCTGTGGTGTGACC         |
| Coagulation Factor II Thrombin Receptor ( <i>F2R</i> )                | F: CCCGGGCTCAACATCACTAC<br>R: GCAACTGCGGAAGAGCTAAG        |
| Histone Deacetylase 2 ( <i>HDAC2</i> )                                | F: ATGGCGTACAGTCAAGGAGGC<br>R: AAATCAGAACAGCTCAGCAAC      |
| Platelet Derived Growth Factor Receptor Beta ( <i>PDGFRB</i> )        | F: GCACTTTTATCCACCCAGGA<br>R: GTACTTGGCTCAGCCTCCAG        |
| Regulator Of Cell Cycle ( <i>RGCC</i> )                               | F: ACTTCCACTACGAGGAGCAC<br>R: TGAATCTGCACTCTCCGAGTC       |
| RUNX Family Transcription Factor 1 ( <i>RUNX1</i> )                   | F: TGAGCTGAGAAATGCTACCGC<br>R: ACTTCGACCGACAAACCTGAG      |
| Transforming Growth Factor Beta 1 ( <i>TGFB1</i> )                    | F: AACGCACTAACTTGACCTACAG                                 |

| Gene name                                                 | Primer sequences (5'→3')                               |
|-----------------------------------------------------------|--------------------------------------------------------|
|                                                           | R: CTCCAGAGTTCAAAGGCATCC                               |
| G Protein Subunit Alpha L ( <i>GNAL</i> )                 | F: CAGCAAGACGACGGAAGACC<br>R: CGCTCTTTCTGCAACTGCTTCTC  |
| <i>Ric8b</i>                                              | F: TGTGACGGTAGACAGTTGGAAG<br>R: GCATTGCTGTGTAGCTCTTCTG |
| Adenylate Cyclase 3 ( <i>ADCY3</i> )                      | F: GCCCAACTTTGCTGACTTCTAC<br>R: GCTCTCTCTCGGACTTGTCTTC |
| Glyceraldehyde 3-phosphate dehydrogenase ( <i>GAPDH</i> ) | F: ATCAAGAAGGTGGTGAAGCAG<br>R: GTCGCTGTTGAAGTCAGAGG    |

**Table S2.** Sequences of small interfering RNA (siRNA) oligonucleotides used in this study.

| Gene name       | siRNA sequence (Sense [S], antisense [A]) |                                                   |
|-----------------|-------------------------------------------|---------------------------------------------------|
| <i>OR2AE1</i>   | #1                                        | S: CAUUACGCCCACAUUGAAU<br>A: AUUCAAUGUGGGCGUAAUG  |
|                 | #2                                        | S: CCUCUAUUUGUGUCUAGGU<br>A: ACCUAGACACAAAUAGAGG  |
| <i>OR2AK2</i>   | #1                                        | S: CUCUUCUCUUUGUCGUCAU<br>A: AUGACGACAAAGAGAAGAG  |
|                 | #2                                        | S: CACCAUUGUCACACCUCUA<br>A: UAGAGGUGUGACAAUGGUG  |
| <i>OR2A1/42</i> | #1                                        | S: CUGUCUAUGAUUGUCUCUA<br>A: UAGAGACAAUCAUAGACAG  |
|                 | #2                                        | S: CCUACCUGCGAAUCAUGGU<br>A: ACCAUGAUUCGCAGGUAGG  |
| <i>OR2A4/7</i>  | #1                                        | S: CAUCAUUGAGCGGUUCUUA<br>A: UAAGAACCGCUCAAUGAUG  |
|                 | #2                                        | S: GAGGAUGAACCUGUCGUGU<br>A: ACACGACAGGUUCAUCCUC  |
| <i>OR10A4</i>   | #1                                        | S: CUGAUCAUUCAAGACACAA<br>A: UUGUGUCUUGAAUGAUCAG  |
|                 | #2                                        | S: CUCUCUCUUCUAUAGCACU<br>A: AGUGCUAUAGAAGAGAGAG  |
| <i>OR10A5</i>   | #1                                        | S: GAGCAAGAAGUUGUUAUCA<br>A: UGAUAACAACUUCUUGCUC  |
|                 | #2                                        | S: CUGAGAGCAAGAAGUUGUU<br>A: AACAAUCUUCUUGCUCUCAG |
| <i>OR51B4</i>   | #1                                        | S: CAUUCAUUCACUGGCCAUU<br>A: AAUGGCCAGUGAAUGAAUG  |
|                 | #2                                        | S: CUCAGAGGCAGUUCACUAC<br>A: GUAGUGAACUGCCUCUGAG  |
| <i>OR51B5</i>   | #1                                        | S: GUAUUGUCACUCCCAUGUU<br>A: AACAUUGGAGUGACAAUAC  |
|                 | #2                                        | S: CGAGUCUGGCAUUCUGCUU<br>A: AAGCAGAAUGCCAGACUCG  |

|                     |    |                                                  |
|---------------------|----|--------------------------------------------------|
| OR51I1              | #1 | S: CUCAACUUUCAUCCUGCUU<br>A: AAGCAGGAUGAAAGUUGAG |
|                     | #2 | S: UCAACACCUGCAUGUCACA<br>A: UGUGACAUGCAGGUGUUGA |
| OR52D1              | #1 | S: AGAUUCCAACCUCAGUGAU<br>A: AUCACUGAGGUUGGAAUCU |
|                     | #2 | S: UCUAUGGAGCUAGAACCAA<br>A: UUGGUUCUAGCUCCAUAGA |
| Non-targeting siRNA |    | S: GAACUGAUGACAGGGAGGC<br>A: GCCUCCCUGUCAUCAGUUC |
